# Supplementary material for: Updating the list of known opioids through identification and characterization of the new opioid derivative 3,4-dichloro-N-(2-(diethylamino)cyclohexyl)-N-methylbenzamide (U-49900)
Source: PubMed Central journal article supplement (PMC5524693; doi:10.1038/s41598-017-06778-9), 2017-07-24
Supplement: 41598_2017_6778_MOESM1_ESM.pdf [file 41598_2017_6778_MOESM1_ESM.pdf]

## Supplementary Information

### Updating the list of known opioids through identification and characterization of the new opioid derivative 3,4-dichloro-N-(2-(diethylamino)cyclohexyl)-N-methylbenzamide (U-49900).

D. Fabregat-Safont<sup>1</sup>, X. Carbón<sup>2</sup>, M. Ventura<sup>2</sup>, I. Fornís<sup>2</sup>, E. Guillamón<sup>3</sup>, J.V. Sancho<sup>1</sup>, F. Hernández<sup>1</sup>, M. Ibáñez<sup>1</sup>

<sup>1</sup> Research Institute for Pesticides and Water, University Jaume I, Avda. Sos Baynat s/n, 12071, Castellón, Spain. <sup>2</sup> Energy Control (Asociación Bienestar y Desarrollo), c/ Independencia 384, 08041, Barcelona, Spain. <sup>3</sup> Departament de Química Física I Analítica, University Jaume I, Avda. Sos Baynat s/n, 12071, Castellón, Spain. Correspondence and request for materials should be addressed to M.I. (email: [ibanezm@uji.es](mailto:ibanezm@uji.es)).

- **SI.1.** MS/MS spectra
- **SI.2.** <sup>1</sup>H-NMR spectra acquired using CDCl<sub>3</sub> and D<sub>2</sub>O comparison.
- **SI.3.** HMBC spectrum
- **SI.4.** FTIR spectrum
- **SI.5.** UV spectrum
- **SI.6.** U-47700 metabolic pathway

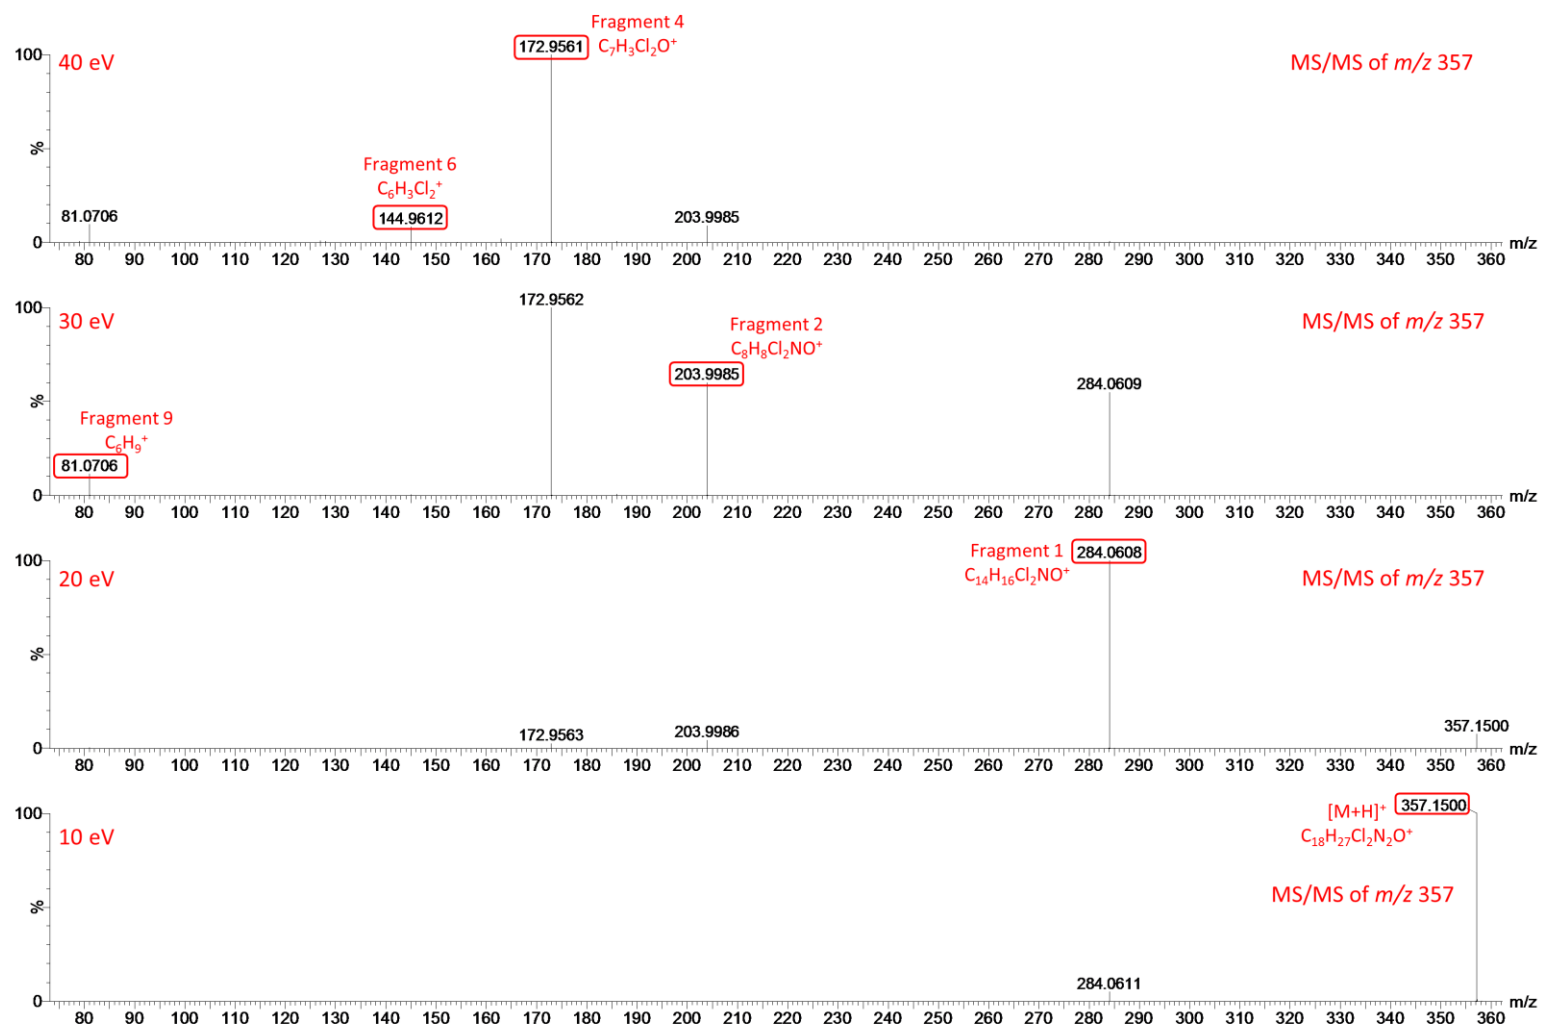

SI.1. MS/MS spectra of U-49900 at 10, 20, 30 and 40 eV collision energy.

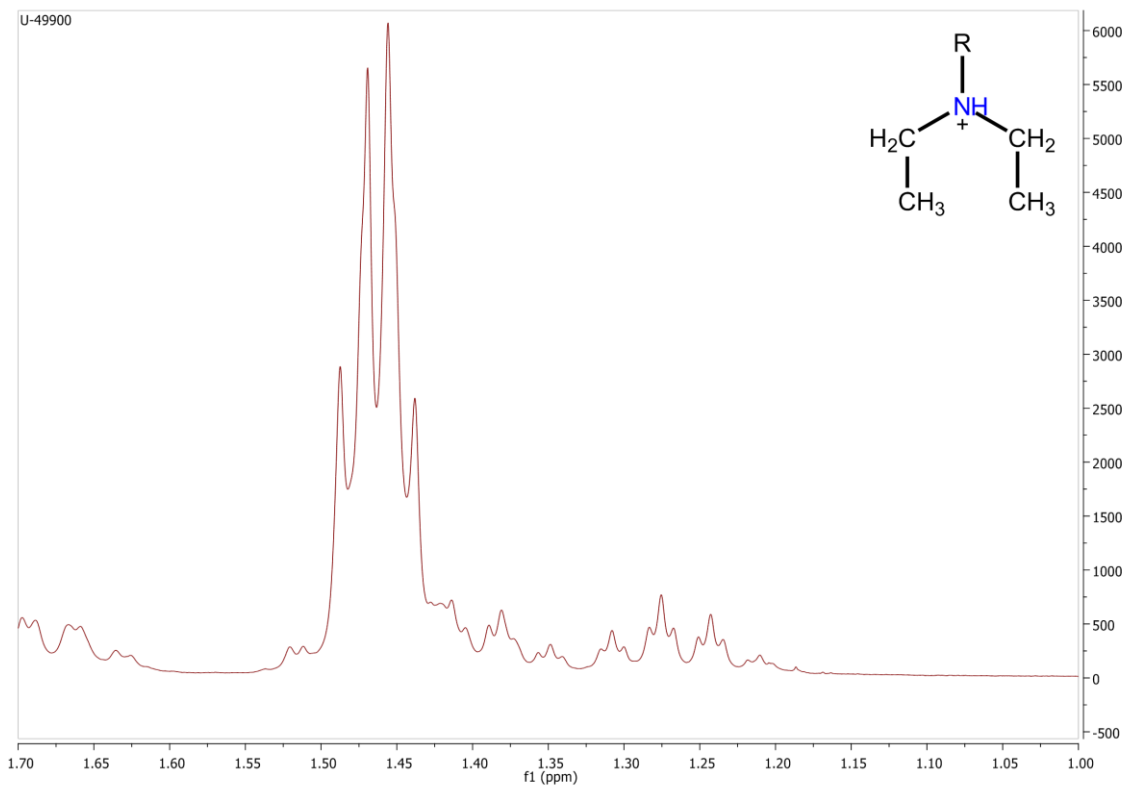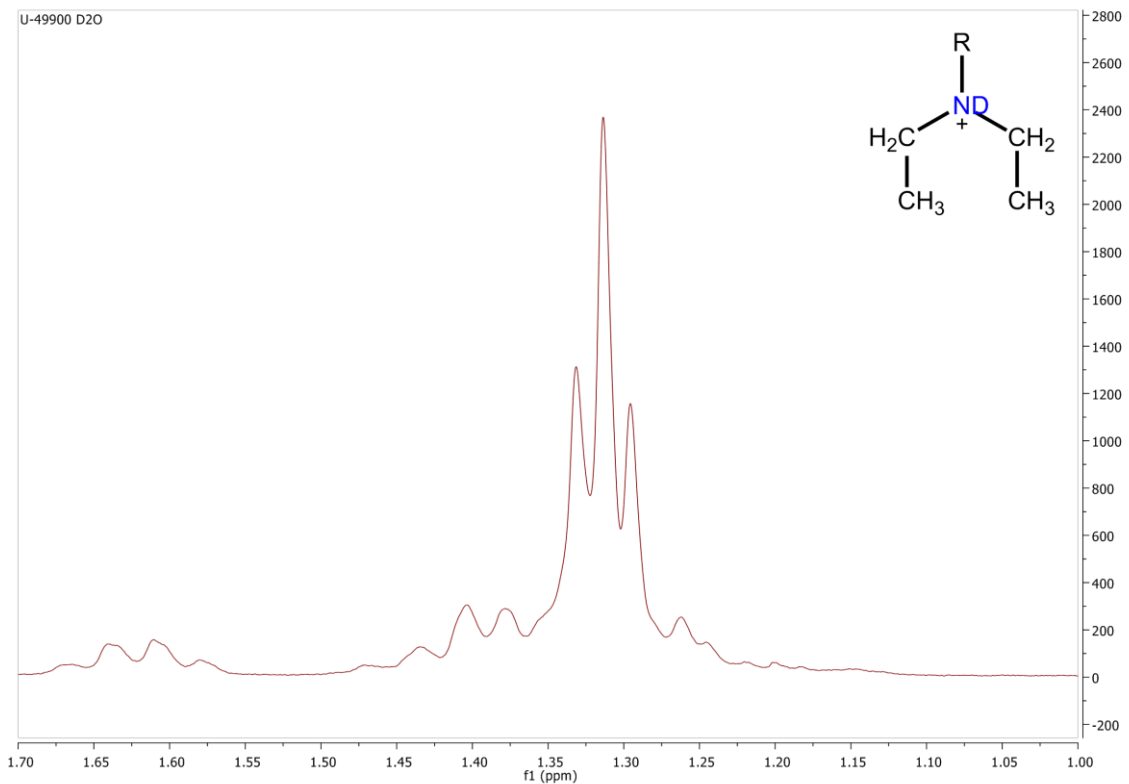

**SI.2.**  $^1\text{H}$ -NMR signal for hydrogens of the methyl groups of diethylamine group. **Top:** Signal obtained when using  $\text{CDCl}_3$  for dissolve the sample. **Bottom:** Signal obtained when using  $\text{D}_2\text{O}$  for dissolving the sample.

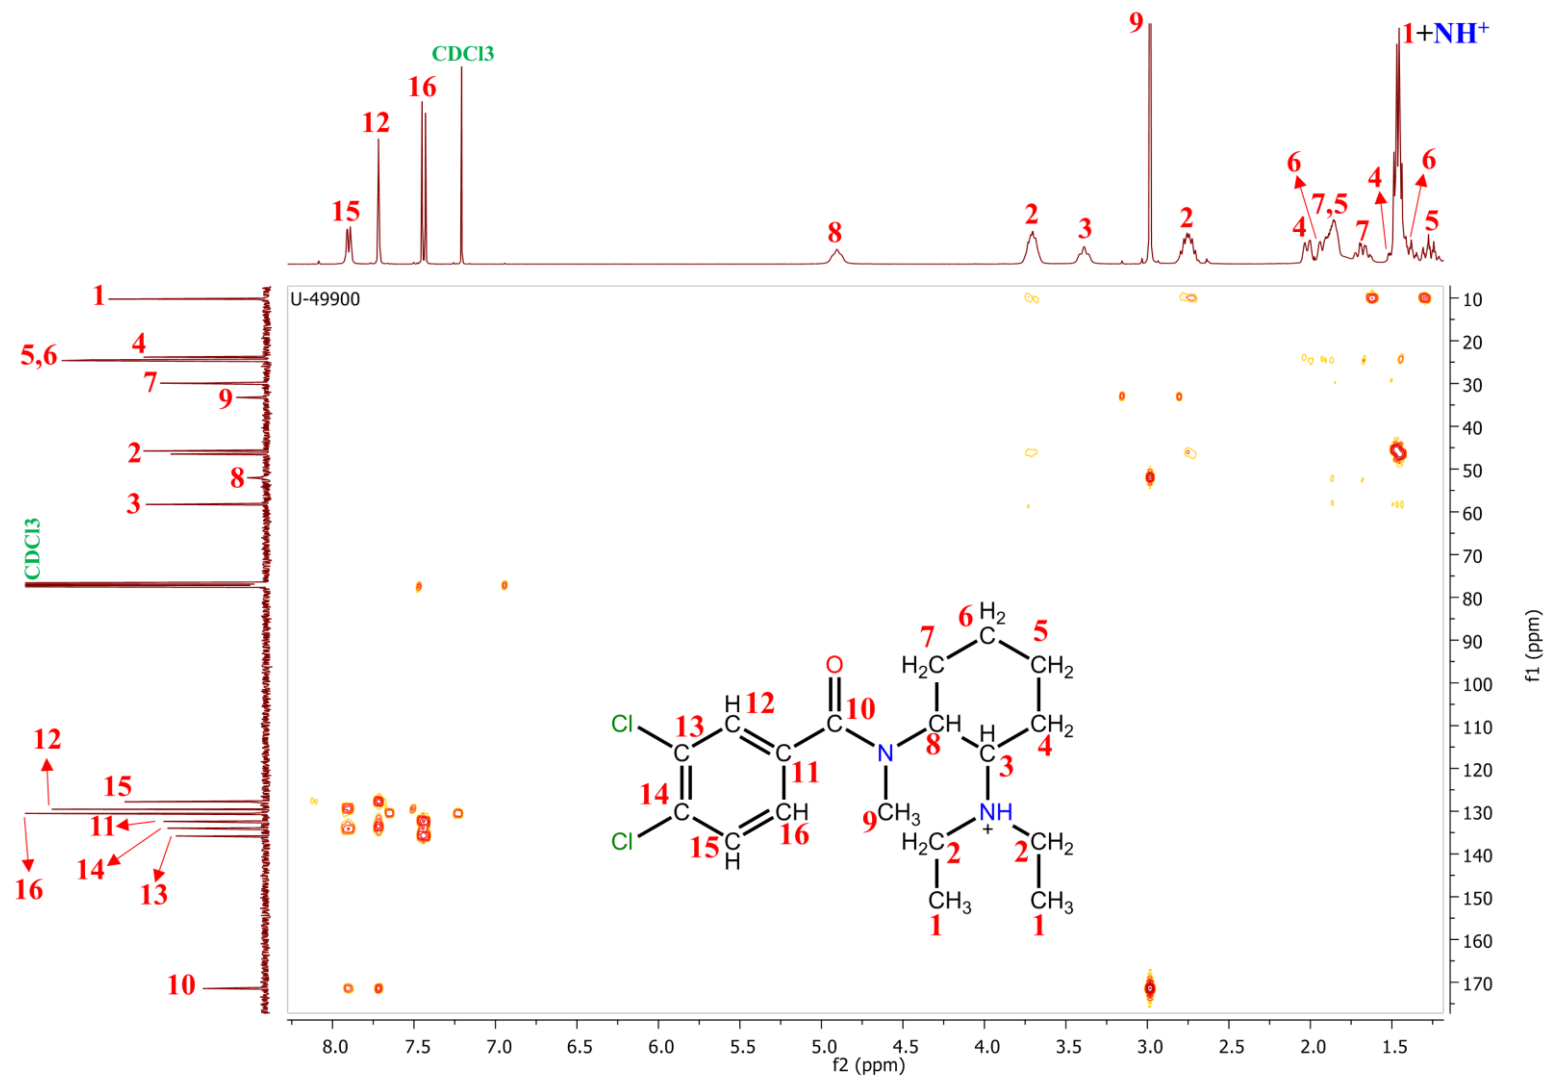

SI.3. HMBC spectra of U-49900. Correlations over 2 bonds are shown between  $^1\text{H}$  and  $^{13}\text{C}$ -NMR signals.

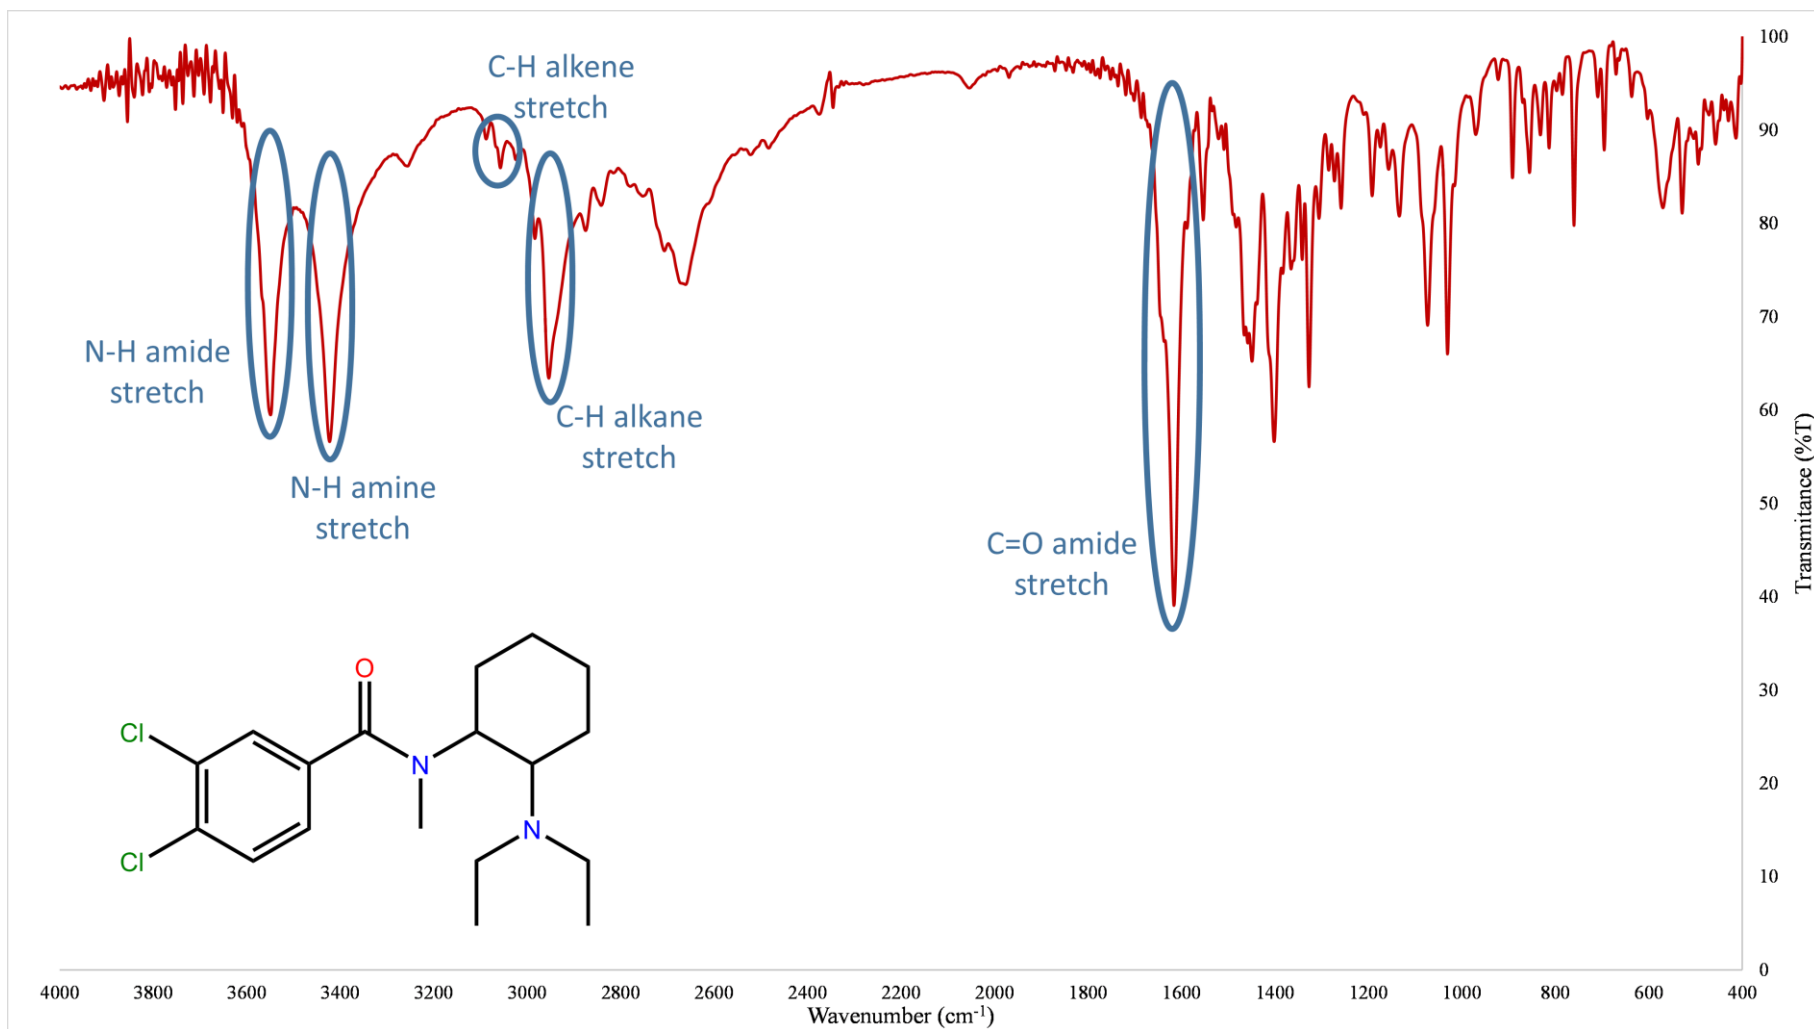

**SI.4.** FTIR spectrum of U-49900. C=O band of the amide group is observed at 1600-1650  $\text{cm}^{-1}$ . Aliphatic C-H bands are observed down to 3000  $\text{cm}^{-1}$ . Aromatic C-H bands are observed up to 3000  $\text{cm}^{-1}$ . N-H band of the amine is observed around 3400  $\text{cm}^{-1}$ . N-H band of the amide is observed around 3500  $\text{cm}^{-1}$ .

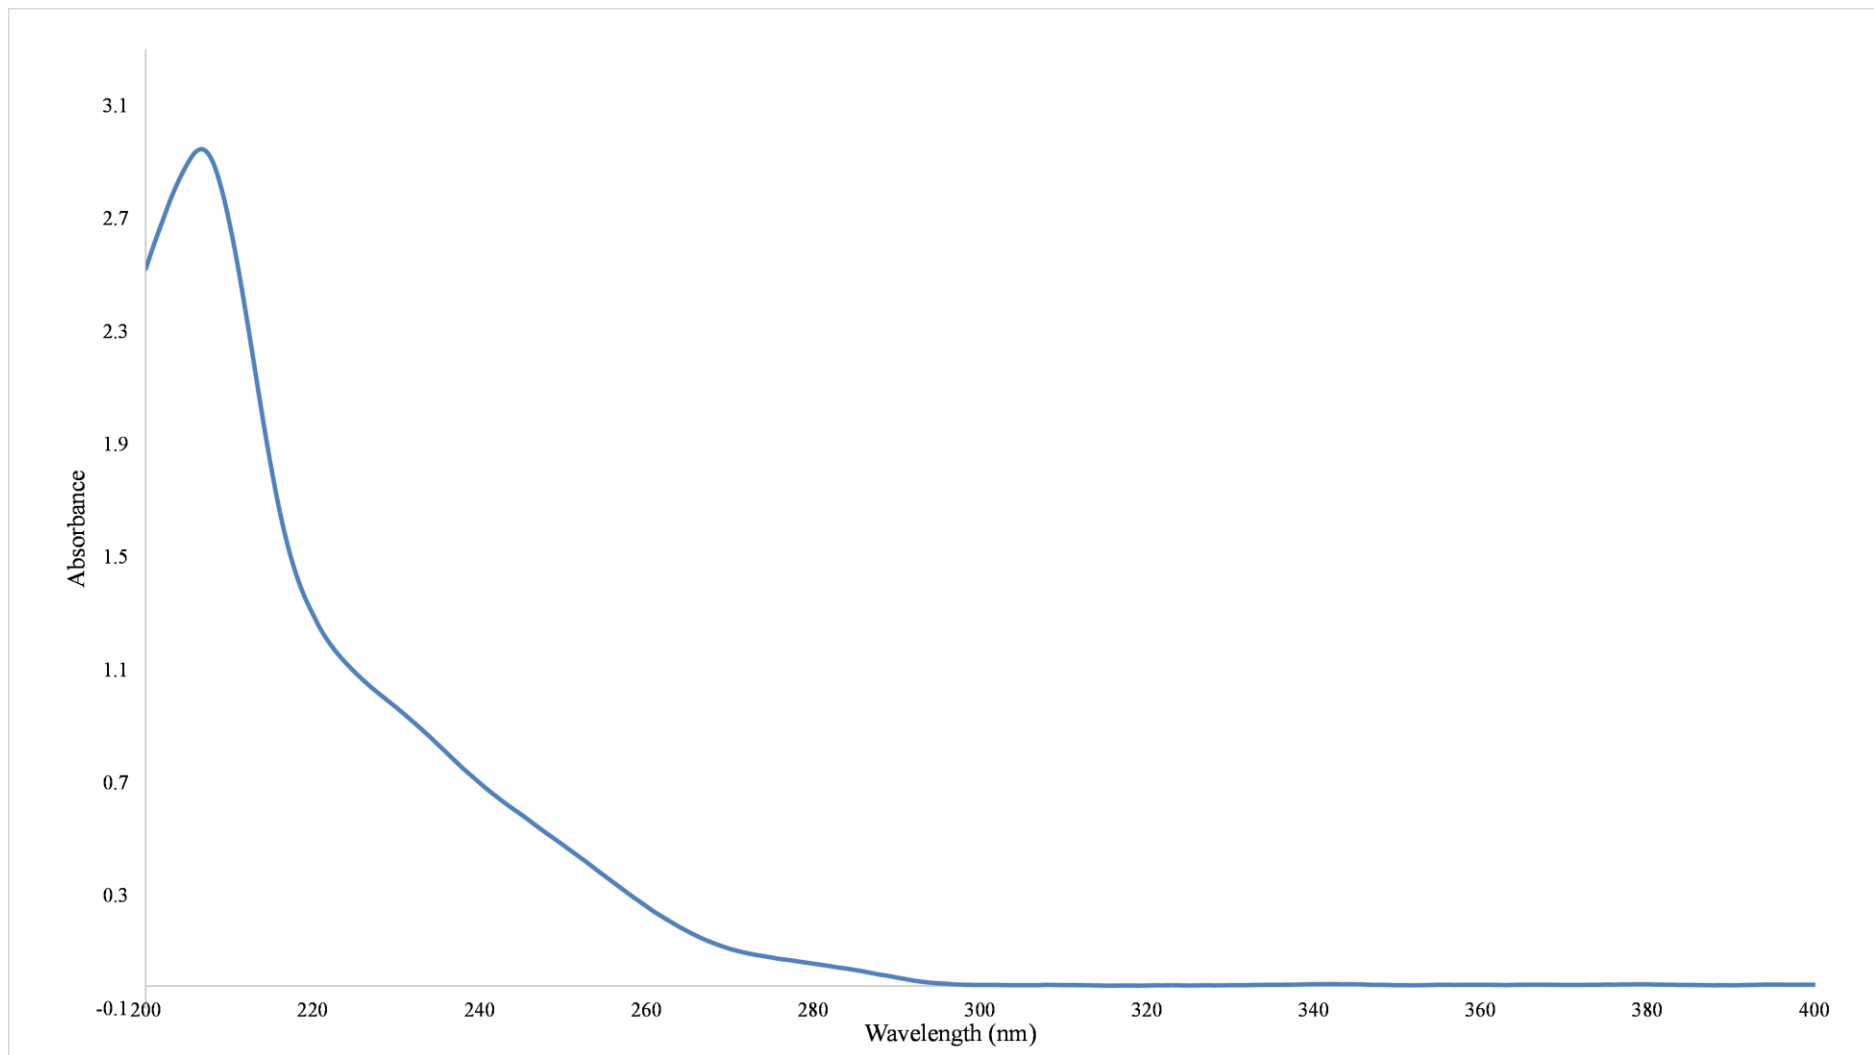

**SI.5.** UV spectrum of the U-49900

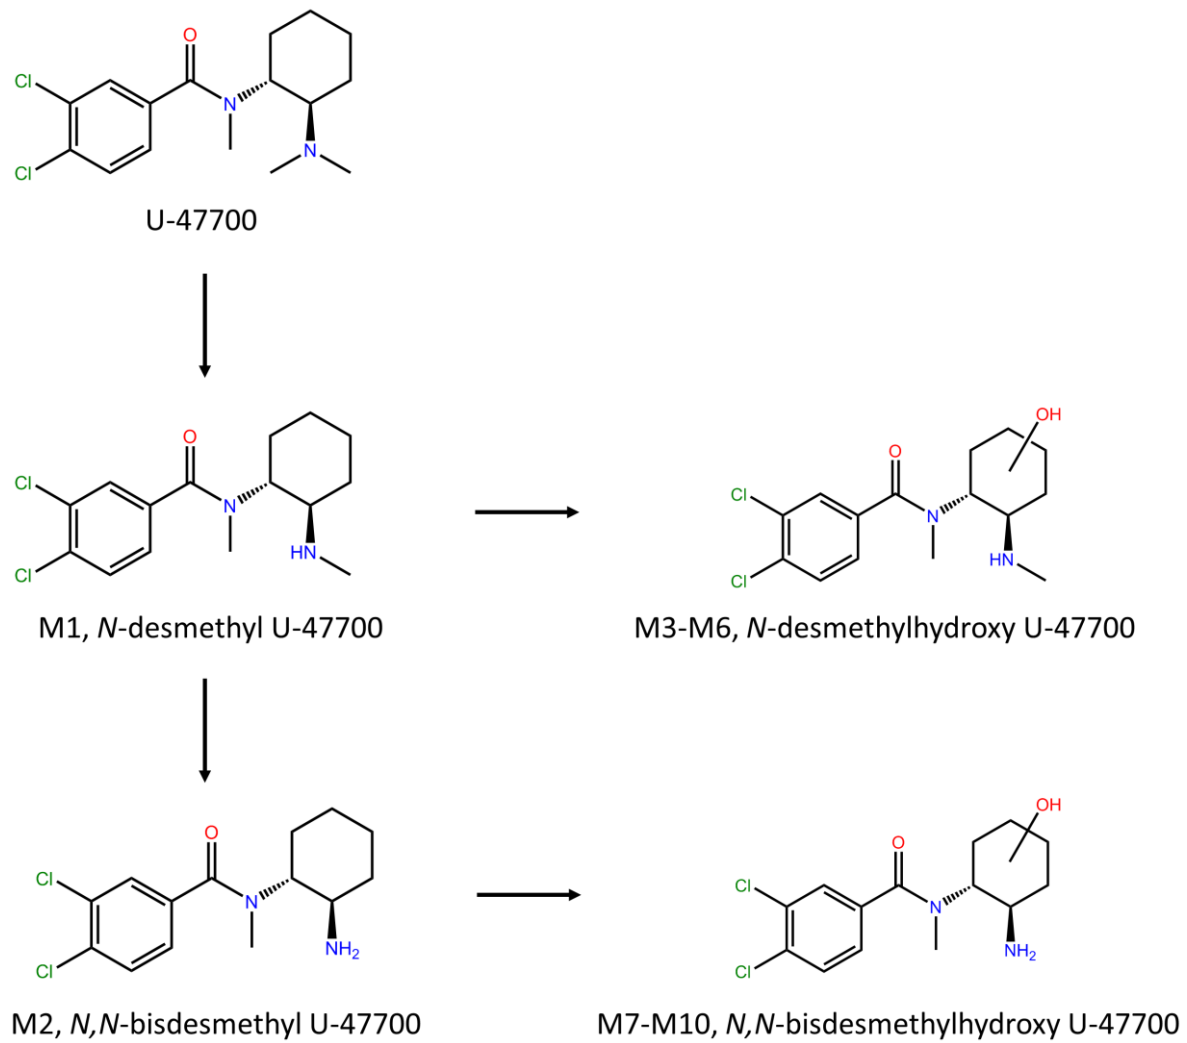

**SI.6.** Proposed metabolic pathway of U-47700.
